# Supplementary material for: Moving Back to the Parental Home in Times of COVID-19: Consequences for Students’ Life Satisfaction
Source: MDPI journal article supplement (doi:10.3390/ijerph191710659), 2022-08-26
Supplement: s1 [file s1]

# Supplementary Material for Moving back to the parental home in times of COVID-19: Consequences for students' life satisfaction

Table S1: Summary of Regression models including interaction terms for age, job loss, and gender

| Variable                                |                            | Model 1             | Model 2            | Model 3             | Model 4             |
|-----------------------------------------|----------------------------|---------------------|--------------------|---------------------|---------------------|
| Moving back to parental home            | No return to parental home | <i>ref.</i>         | <i>ref.</i>        | <i>ref.</i>         | <i>ref.</i>         |
|                                         | Return to parental home    | -0.352*<br>(0.173)  | 3.235*<br>(1.461)  | -0.291<br>(0.210)   | -0.375*<br>(0.188)  |
| Employment situation                    | No change                  | <i>ref.</i>         | <i>ref.</i>        | <i>ref.</i>         | <i>ref.</i>         |
|                                         | Job loss                   | -0.142<br>(0.142)   | -0.139<br>(0.142)  | -0.107<br>(0.158)   | -0.141<br>(0.142)   |
| Age                                     | Age                        | -0.191<br>(0.251)   | 0.017<br>(0.264)   | -0.184<br>(0.251)   | -0.188<br>(0.251)   |
|                                         | Age <sup>2</sup>           | 0.003<br>(0.005)    | -0.001<br>(0.005)  | 0.003<br>(0.005)    | 0.003<br>(0.005)    |
| Gender                                  | Female                     | <i>ref.</i>         | <i>ref.</i>        | <i>ref.</i>         | <i>ref.</i>         |
|                                         | Male                       | 0.082<br>(0.167)    | 0.074<br>(0.167)   | 0.080<br>(0.167)    | 0.058<br>(0.184)    |
| Return to parental home x Age           |                            |                     | -0.159*<br>(0.064) |                     |                     |
| Return to parental home x Job loss      |                            |                     |                    | -0.180<br>(0.352)   |                     |
| Return to parental home x Gender = Male |                            |                     |                    |                     | 0.140<br>(0.445)    |
| Intercept                               |                            | 10.205**<br>(3.120) | 7.368*<br>(3.317)  | 10.103**<br>(3.128) | 10.168**<br>(3.124) |
| R <sup>2</sup>                          |                            | 0.011               | 0.018              | 0.011               | 0.011               |
| adjusted R <sup>2</sup>                 |                            | 0.006               | 0.011              | 0.005               | 0.005               |
| F                                       |                            | 2.044               | 2.732*             | 1.746               | 1.719               |
| N                                       |                            | 913                 | 913                | 913                 | 913                 |

Note. \*p < .05. \*\*p < .01. \*\*\*p < .001. Standard errors in parentheses.
